# Supplementary material for: Cold storage characteristics of hardy kiwifruit, Actinidia arguta ‘Autumn Sense’: comparison between two cold storage temperatures
Source: Front Plant Sci. 2025 Oct 22;16:1692735. doi: 10.3389/fpls.2025.1692735 (PMC12586017; doi:10.3389/fpls.2025.1692735)
Supplement: Supplementary file 2 [file DataSheet2.xlsx]

## Sheet: Table S2
Table S2. List of genes associated with GO:0098754 (Detoxification)
Contig ID	GO	UniProt	NR	Pfam	EggNOG	NT	KO_EUK	Log2 FC (VL/ML)
c94639_g4_i1	UNIPROTKB|B9GRA4 - symbol:POPTR_0002s25530g "Uncharacterized protein" species:3694 "Populus trichocarpa" [GO:0004364 "glutathione transferase activity" evidence=IBA] [GO:0005737 "cytoplasm" evidence=IBA] [GO:0006749 "glutathione metabolic process" evidence=IBA] [GO:0009407 "toxin catabolic process" evidence=IBA] InterPro:IPR004045 Pfam:PF02798 PROSITE:PS50404 Pfam:PF00043 InterPro:IPR004046 GO:GO…	sp|Q03664|GSTX3_TOBAC Probable glutathione S-transferase OS=Nicotiana tabacum PE=2 SV=1	XP_021676720.1 probable glutathione S-transferase [Hevea brasiliensis]	A0A072VR29_MEDTR/13-196 A0A072VR29.1 PF00043.22;GST_C;	3694.POPTR_0002s25530.1	XM_018994735 PREDICTED: Juglans regia probable glutathione S-transferase (LOC109012872), mRNA	csin:114299492 probable glutathione S-transferase	9.4385
c90830_g2_i1	UNIPROTKB|I1LR93 - symbol:GLYMA_12G081300 "Superoxide dismutase [Cu-Zn]" species:3847 "Glycine max" [GO:0004784 "superoxide dismutase activity" evidence=IBA] [GO:0005507 "copper ion binding" evidence=IBA] [GO:0005737 "cytoplasm" evidence=IBA] [GO:0008270 "zinc ion binding" evidence=IBA] [GO:0019430 "removal of superoxide radicals" evidence=IBA] InterPro:IPR001424 InterPro:IPR018152 InterPro:IPR03…	sp|P93407|SODCP_ORYSJ Superoxide dismutase [Cu-Zn], chloroplastic OS=Oryza sativa subsp. japonica GN=SODCP PE=1 SV=1	PSR86551.1 Superoxide dismutase [Actinidia chinensis var. chinensis]	A2YY59_ORYSI/58-198 A2YY59.1 PF00080.17;Sod_Cu;	3847.GLYMA12G08650.1	KR363003 Eurya emarginata Cu-Zn superoxide dismutase (SOD) mRNA, complete cds	mnt:21395019 superoxide dismutase [Cu-Zn], chloroplastic	4.65845
c70277_g1_i1	UNIPROTKB|D7SRE4 - symbol:VIT_18s0072g00320 "Putative uncharacterized protein" species:29760 "Vitis vinifera" [GO:0004364 "glutathione transferase activity" evidence=IBA] [GO:0005737 "cytoplasm" evidence=IBA] [GO:0006749 "glutathione metabolic process" evidence=IBA] [GO:0009407 "toxin catabolic process" evidence=IBA] InterPro:IPR004045 Pfam:PF02798 PROSITE:PS50404 GO:GO:0005737 InterPro:IPR036249…	sp|Q9FQA3|GST23_MAIZE Glutathione transferase GST 23 OS=Zea mays PE=2 SV=1	PSS24036.1 Glutathione transferase [Actinidia chinensis var. chinensis]	D7SRE4_VITVI/142-246 D7SRE4.1 PF13410.3;GST_C_2;	29760.VIT_18s0072g00320.t01	XM_018119107 PREDICTED: Theobroma cacao probable glutathione S-transferase (LOC18602851), mRNA	vvi:100253876 glutathione transferase GST 23	4.46485
c94690_g1_i3	UNIPROTKB|F6HEA4 - symbol:VIT_16s0039g00970 "Putative uncharacterized protein" species:29760 "Vitis vinifera" [GO:0004364 "glutathione transferase activity" evidence=IBA] [GO:0005737 "cytoplasm" evidence=IBA] [GO:0006749 "glutathione metabolic process" evidence=IBA] [GO:0009407 "toxin catabolic process" evidence=IBA] InterPro:IPR004045 Pfam:PF02798 PROSITE:PS50404 Pfam:PF00043 InterPro:IPR004046 …	sp|P32110|GSTX6_SOYBN Probable glutathione S-transferase OS=Glycine max GN=HSP26-A PE=2 SV=1	PSS26522.1 Glutathione S-transferase [Actinidia chinensis var. chinensis]	M1CB10_SOLTU/7-117 M1CB10.1 PF00043.22;GST_C;	3847.GLYMA05G29400.1	.	csin:114313106 probable glutathione S-transferase	3.72134
c85060_g1_i1	UNIPROTKB|A5AZ36 - symbol:VIT_04s0079g00360 "Putative uncharacterized protein" species:29760 "Vitis vinifera" [GO:0004364 "glutathione transferase activity" evidence=IBA] [GO:0005737 "cytoplasm" evidence=IBA] [GO:0006749 "glutathione metabolic process" evidence=IBA] [GO:0009407 "toxin catabolic process" evidence=IBA] InterPro:IPR004045 Pfam:PF02798 PROSITE:PS50404 Pfam:PF00043 InterPro:IPR004046 …	sp|Q03666|GSTX4_TOBAC Probable glutathione S-transferase OS=Nicotiana tabacum PE=2 SV=1	PSS30084.1 Glutathione S-transferase [Actinidia chinensis var. chinensis]	K4B9Z4_SOLLC/86-196 K4B9Z4.1 PF00043.22;GST_C;	29760.VIT_04s0079g00360.t01	.	pvy:116134903 probable glutathione S-transferase	3.5901
c92095_g1_i5	UNIPROTKB|A9PAB4 - symbol:POPTR_0005s04590g "Superoxide dismutase [Cu-Zn]" species:3694 "Populus trichocarpa" [GO:0004784 "superoxide dismutase activity" evidence=IBA] [GO:0005507 "copper ion binding" evidence=IBA] [GO:0005737 "cytoplasm" evidence=IBA] [GO:0008270 "zinc ion binding" evidence=IBA] [GO:0019430 "removal of superoxide radicals" evidence=IBA] InterPro:IPR001424 InterPro:IPR018152 Inte…	sp|Q8L5E0|SODC2_OLEEU Superoxide dismutase [Cu-Zn] 2 OS=Olea europaea GN=OLE5 PE=1 SV=2	PSR92657.1 Superoxide dismutase [Actinidia chinensis var. chinensis]	U5D3P0_AMBTC/32-172 U5D3P0.1 PF00080.17;Sod_Cu;	3694.POPTR_0005s04590.1	KR078346 Camellia sinensis copper/zinc-superoxide dismutase 1a (CSD1a) mRNA, complete cds	csin:114306074 superoxide dismutase [Cu-Zn] 1	3.53886
c99804_g1_i2	UNIPROTKB|F6HR77 - symbol:VIT_19s0093g00260 "Putative uncharacterized protein" species:29760 "Vitis vinifera" [GO:0004364 "glutathione transferase activity" evidence=IBA] [GO:0005737 "cytoplasm" evidence=IBA] [GO:0006749 "glutathione metabolic process" evidence=IBA] [GO:0009407 "toxin catabolic process" evidence=IBA] InterPro:IPR004045 Pfam:PF02798 PROSITE:PS50404 Pfam:PF00043 InterPro:IPR004046 …	sp|Q03666|GSTX4_TOBAC Probable glutathione S-transferase OS=Nicotiana tabacum PE=2 SV=1	PSS16047.1 Glutathione S-transferase [Actinidia chinensis var. chinensis]	M7YCB1_TRIUA/22-197 M7YCB1.1 PF13410.3;GST_C_2;	29760.VIT_19s0093g00260.t01	.	csin:114292142 glutathione S-transferase U25-like isoform X1	2.53666
c99804_g3_i1	UNIPROTKB|K4CGI3 - symbol:K4CGI3 "Uncharacterized protein" species:4081 "Solanum lycopersicum" [GO:0004364 "glutathione transferase activity" evidence=IBA] [GO:0005737 "cytoplasm" evidence=IBA] [GO:0006749 "glutathione metabolic process" evidence=IBA] [GO:0009407 "toxin catabolic process" evidence=IBA] InterPro:IPR004045 Pfam:PF02798 PROSITE:PS50404 GO:GO:0005737 InterPro:IPR036249 SUPFAM:SSF5283…	sp|Q9SHH7|GSTUP_ARATH Glutathione S-transferase U25 OS=Arabidopsis thaliana GN=GSTU25 PE=1 SV=1	PSS05898.1 Glutathione S-transferase [Actinidia chinensis var. chinensis]	G7LB15_MEDTR/73-214 G7LB15.1 PF13410.3;GST_C_2;	4081.Solyc07g056510.2.1	XM_021432917 PREDICTED: Herrania umbratica probable glutathione S-transferase (LOC110419807), mRNA	cann:107852043 probable glutathione S-transferase parC	2.49409
c97352_g2_i1	UNIPROTKB|F6HPH1 - symbol:VIT_01s0026g01340 "Putative uncharacterized protein" species:29760 "Vitis vinifera" [GO:0004364 "glutathione transferase activity" evidence=IBA] [GO:0005737 "cytoplasm" evidence=IBA] [GO:0006749 "glutathione metabolic process" evidence=IBA] [GO:0009407 "toxin catabolic process" evidence=IBA] InterPro:IPR004045 Pfam:PF02798 PROSITE:PS50404 Pfam:PF00043 InterPro:IPR004046 …	sp|Q9FUS8|GSTUH_ARATH Glutathione S-transferase U17 OS=Arabidopsis thaliana GN=GSTU17 PE=2 SV=1	PSS13553.1 Glutathione S-transferase [Actinidia chinensis var. chinensis]	F6HPH1_VITVI/91-201 F6HPH1.1 PF00043.22;GST_C;	29760.VIT_01s0026g01340.t01	KT601064 Vaccinium corymbosum tau class glutathione S-transferase (GSTU1) mRNA, complete cds	csin:114286698 glutathione S-transferase U17-like	2.28198
c102400_g1_i1	UNIPROTKB|A9PG99 - symbol:POPTR_0010s04490g "GLUTATHIONE S-TRANSFERASE 30 family protein" species:3694 "Populus trichocarpa" [GO:0004364 "glutathione transferase activity" evidence=IBA] [GO:0005737 "cytoplasm" evidence=IBA] [GO:0006749 "glutathione metabolic process" evidence=IBA] [GO:0009407 "toxin catabolic process" evidence=IBA] InterPro:IPR004045 Pfam:PF02798 PROSITE:PS50404 Pfam:PF00043 Inte…	sp|Q9FUS8|GSTUH_ARATH Glutathione S-transferase U17 OS=Arabidopsis thaliana GN=GSTU17 PE=2 SV=1	PSS13552.1 Glutathione S-transferase like [Actinidia chinensis var. chinensis]	F6HPH1_VITVI/91-201 F6HPH1.1 PF00043.22;GST_C;	3694.POPTR_0010s03960.1	XM_019302515 PREDICTED: Ipomoea nil glutathione S-transferase U17-like (LOC109154789), transcript variant X2, mRNA	csin:114286435 glutathione S-transferase U18-like	2.1723
c91380_g2_i1	UNIPROTKB|F6HPH1 - symbol:VIT_01s0026g01340 "Putative uncharacterized protein" species:29760 "Vitis vinifera" [GO:0004364 "glutathione transferase activity" evidence=IBA] [GO:0005737 "cytoplasm" evidence=IBA] [GO:0006749 "glutathione metabolic process" evidence=IBA] [GO:0009407 "toxin catabolic process" evidence=IBA] InterPro:IPR004045 Pfam:PF02798 PROSITE:PS50404 Pfam:PF00043 InterPro:IPR004046 …	sp|Q9FUS9|GSTUI_ARATH Glutathione S-transferase U18 OS=Arabidopsis thaliana GN=GSTU18 PE=2 SV=1	PSS28695.1 Glutathione S-transferase [Actinidia chinensis var. chinensis]	F6HPH1_VITVI/91-201 F6HPH1.1 PF00043.22;GST_C;	29760.VIT_01s0026g01340.t01	XM_007044342 PREDICTED: Theobroma cacao glutathione S-transferase U17 (LOC18609306), mRNA	csin:114305914 glutathione S-transferase U17-like	2.07593
c96405_g1_i1	UNIPROTKB|F6HL15 - symbol:VIT_08s0007g01420 "Putative uncharacterized protein" species:29760 "Vitis vinifera" [GO:0004364 "glutathione transferase activity" evidence=IBA] [GO:0005737 "cytoplasm" evidence=IBA] [GO:0006749 "glutathione metabolic process" evidence=IBA] [GO:0009407 "toxin catabolic process" evidence=IBA] InterPro:IPR004045 Pfam:PF02798 PROSITE:PS50404 Pfam:PF00043 InterPro:IPR004046 …	sp|Q03662|GSTX1_TOBAC Probable glutathione S-transferase OS=Nicotiana tabacum PE=2 SV=1	PSS34595.1 Glutathione S-transferase [Actinidia chinensis var. chinensis]	A0A072VR29_MEDTR/13-196 A0A072VR29.1 PF00043.22;GST_C;	29760.VIT_08s0007g01420.t01	XM_022994276 PREDICTED: Olea europaea var. sylvestris probable glutathione S-transferase (LOC111372105), transcript variant X2, mRNA	csin:114313619 probable glutathione S-transferase	1.92762
c77474_g1_i1	UNIPROTKB|B9NBW2 - symbol:POPTR_0010s08170g "Tau class glutathione transferase GSTU52" species:3694 "Populus trichocarpa" [GO:0004364 "glutathione transferase activity" evidence=IBA] [GO:0005737 "cytoplasm" evidence=IBA] [GO:0006749 "glutathione metabolic process" evidence=IBA] [GO:0009407 "toxin catabolic process" evidence=IBA] InterPro:IPR004045 Pfam:PF02798 PROSITE:PS50404 GO:GO:0005737 InterP…	sp|P32110|GSTX6_SOYBN Probable glutathione S-transferase OS=Glycine max GN=HSP26-A PE=2 SV=1	PSS33761.1 Glutathione S-transferase [Actinidia chinensis var. chinensis]	K7L093_SOYBN/23-117 K7L093.1 PF00043.22;GST_C;	3847.GLYMA07G08202.1	.	csin:114279623 probable glutathione S-transferase	1.88215
c13775_g1_i1	TAIR|locus:2117612 - symbol:NTRB "AT4G35460" species:3702 "Arabidopsis thaliana" [GO:0019430 "removal of superoxide radicals" evidence=IEA] [GO:0055114 "oxidation-reduction process" evidence=IEA;ISS] [GO:0004791 "thioredoxin-disulfide reductase activity" evidence=ISS;IDA] [GO:0009941 "chloroplast envelope" evidence=IDA] [GO:0005739 "mitochondrion" evidence=IDA] [GO:0005829 "cytosol" evidence=IDA]…	sp|Q39243|TRXB1_ARATH Thioredoxin reductase 1, mitochondrial OS=Arabidopsis thaliana GN=NTR1 PE=1 SV=3	PSS00349.1 Thioredoxin reductase [Actinidia chinensis var. chinensis]	K4BA95_SOLLC/48-345 K4BA95.1 PF07992.11;Pyr_redox_2;	29760.VIT_04s0044g01750.t01	.	fve:101291563 thioredoxin reductase NTRB-like	1.73884
c87232_g1_i1	UNIPROTKB|F6HPH1 - symbol:VIT_01s0026g01340 "Putative uncharacterized protein" species:29760 "Vitis vinifera" [GO:0004364 "glutathione transferase activity" evidence=IBA] [GO:0005737 "cytoplasm" evidence=IBA] [GO:0006749 "glutathione metabolic process" evidence=IBA] [GO:0009407 "toxin catabolic process" evidence=IBA] InterPro:IPR004045 Pfam:PF02798 PROSITE:PS50404 Pfam:PF00043 InterPro:IPR004046 …	sp|Q9FUS8|GSTUH_ARATH Glutathione S-transferase U17 OS=Arabidopsis thaliana GN=GSTU17 PE=2 SV=1	BAI40146.1 glutathione S-transferase 1 [Diospyros kaki]	F6HPH1_VITVI/91-201 F6HPH1.1 PF00043.22;GST_C;	29760.VIT_01s0026g01340.t01	XM_021892062 PREDICTED: Chenopodium quinoa glutathione S-transferase U17-like (LOC110713611), mRNA	minc:123214403 glutathione S-transferase U17-like	1.66453
c97177_g1_i1	UNIPROTKB|Q9BBU5 - symbol:CCS "Cu/Zn-superoxide dismutase copper chaperone" species:3847 "Glycine max" [GO:0004784 "superoxide dismutase activity" evidence=IBA] [GO:0005507 "copper ion binding" evidence=IBA] [GO:0005737 "cytoplasm" evidence=IBA] [GO:0008270 "zinc ion binding" evidence=IBA] [GO:0019430 "removal of superoxide radicals" evidence=IBA] InterPro:IPR001424 InterPro:IPR006121 InterPro:IP…	sp|Q9LD47|CCS_ARATH Copper chaperone for superoxide dismutase, chloroplastic/cytosolic OS=Arabidopsis thaliana GN=CCS PE=1 SV=1	PSS11472.1 Copper chaperone for superoxide dismutase [Actinidia chinensis var. chinensis]	B9GW33_POPTR/171-301 B9GW33.1 PF00080.17;Sod_Cu;	3847.GLYMA05G04170.1	KP337338 Camellia sinensis cultivar Tieguanyin copper chaperone for superoxide dismutase (CCS) mRNA, complete cds	csin:114267639 copper chaperone for superoxide dismutase, chloroplastic/cytosolic	1.59617
c91011_g1_i2	UNIPROTKB|B9NBW2 - symbol:POPTR_0010s08170g "Tau class glutathione transferase GSTU52" species:3694 "Populus trichocarpa" [GO:0004364 "glutathione transferase activity" evidence=IBA] [GO:0005737 "cytoplasm" evidence=IBA] [GO:0006749 "glutathione metabolic process" evidence=IBA] [GO:0009407 "toxin catabolic process" evidence=IBA] InterPro:IPR004045 Pfam:PF02798 PROSITE:PS50404 GO:GO:0005737 InterP…	sp|P32110|GSTX6_SOYBN Probable glutathione S-transferase OS=Glycine max GN=HSP26-A PE=2 SV=1	PSR92868.1 Glutathione S-transferase [Actinidia chinensis var. chinensis]	A0A072VR29_MEDTR/13-196 A0A072VR29.1 PF00043.22;GST_C;	3694.POPTR_0010s08170.1	.	csin:114279623 probable glutathione S-transferase	1.19233
c95328_g1_i1	TAIR|locus:2131586 - symbol:APX3 "AT4G35000" species:3702 "Arabidopsis thaliana" [GO:0000302 "response to reactive oxygen species" evidence=IBA] [GO:0004130 "cytochrome-c peroxidase activity" evidence=IBA] [GO:0016021 "integral component of membrane" evidence=IEA] [GO:0016688 "L-ascorbate peroxidase activity" evidence=ISS] [GO:0020037 "heme binding" evidence=IEA] [GO:0034599 "cellular response to…	sp|Q42564|APX3_ARATH L-ascorbate peroxidase 3 OS=Arabidopsis thaliana GN=APX3 PE=1 SV=1	PSS25985.1 L-ascorbate peroxidase 3, peroxisomal like [Actinidia chinensis var. chinensis]	A0A022RC95_ERYGU/16-224 A0A022RC95.1 PF00141.20;peroxidase;	4113.PGSC0003DMT400015799	JQ011380 Camellia sinensis peroxisomal ascorbate peroxidase (APX-1) mRNA, complete cds	csin:114279703 L-ascorbate peroxidase 3-like	-1.28843
c95490_g1_i1	TAIR|locus:2139712 - symbol:GPX6 "AT4G11600" species:3702 "Arabidopsis thaliana" [GO:0004602 "glutathione peroxidase activity" evidence=ISS] [GO:0005739 "mitochondrion" evidence=ISM;IDA;TAS] [GO:0006979 "response to oxidative stress" evidence=IEA] [GO:0047066 "phospholipid-hydroperoxide glutathione peroxidase activity" evidence=IEA] [GO:0055114 "oxidation-reduction process" evidence=IEA;ISS] [GO:…	sp|O48646|GPX6_ARATH Probable phospholipid hydroperoxide glutathione peroxidase 6, mitochondrial OS=Arabidopsis thaliana GN=GPX6 PE=2 SV=2	GAV57939.1 GSHPx domain-containing protein [Cephalotus follicularis]	B9RCA6_RICCO/10-118 B9RCA6.1 PF00255.16;GSHPx;	3694.POPTR_0003s12620.1	HM003262 Camellia sinensis clone U10BcDNA 2530 glutathione peroxidase mRNA, complete cds	csin:114288986 probable phospholipid hydroperoxide glutathione peroxidase	-1.33274
c78389_g1_i1	UNIPROTKB|F6I5C2 - symbol:VIT_15s0024g01540 "Putative uncharacterized protein" species:29760 "Vitis vinifera" [GO:0004364 "glutathione transferase activity" evidence=IBA] [GO:0005737 "cytoplasm" evidence=IBA] [GO:0006749 "glutathione metabolic process" evidence=IBA] [GO:0009407 "toxin catabolic process" evidence=IBA] InterPro:IPR004045 Pfam:PF02798 PROSITE:PS50404 Pfam:PF00043 InterPro:IPR004046 …	sp|Q9ZW24|GSTU7_ARATH Glutathione S-transferase U7 OS=Arabidopsis thaliana GN=GSTU7 PE=2 SV=1	PSS11957.1 Glutathione S-transferase [Actinidia chinensis var. chinensis]	F6I5C2_VITVI/3-76 F6I5C2.1 PF02798.17;GST_N;	29760.VIT_15s0024g01540.t01	XM_006437296 Citrus clementina hypothetical protein (CICLE_v10032702mg) mRNA, complete cds	csin:114258095 glutathione transferase GST 23-like	-2.59071

## Sheet: Table S3
Table S3. List of genes associated with GO:0016209 (antioxidant activity)
Contig ID	GO	UniProt	NR	Pfam	EggNOG	NT	KO_EUK	Log2 FC (VL/ML)
c94445_g1_i1	UNIPROTKB|F6GY60 - symbol:VIT_18s0072g00160 "Peroxidase" species:29760 "Vitis vinifera" [GO:0004601 "peroxidase activity" evidence=IBA] [GO:0009505 "plant-type cell wall" evidence=IBA] [GO:0009664 "plant-type cell wall organization" evidence=IBA] InterPro:IPR000823 InterPro:IPR002016 InterPro:IPR010255 InterPro:IPR019794 InterPro:IPR033905 Pfam:PF00141 PRINTS:PR00458 PRINTS:PR00461 PROSITE:PS0043…	sp|Q96520|PER12_ARATH Peroxidase 12 OS=Arabidopsis thaliana GN=PER12 PE=1 SV=1	PSS19515.1 Peroxidase [Actinidia chinensis var. chinensis]	F6GY60_VITVI/33-276 F6GY60.1 PF00141.20;peroxidase;	29760.VIT_18s0072g00160.t01	XM_003634474 PREDICTED: Vitis vinifera peroxidase 12 (LOC100854817), mRNA	hbr:110652700 peroxidase 12-like	6.57246
c90830_g2_i1	UNIPROTKB|I1LR93 - symbol:GLYMA_12G081300 "Superoxide dismutase [Cu-Zn]" species:3847 "Glycine max" [GO:0004784 "superoxide dismutase activity" evidence=IBA] [GO:0005507 "copper ion binding" evidence=IBA] [GO:0005737 "cytoplasm" evidence=IBA] [GO:0008270 "zinc ion binding" evidence=IBA] [GO:0019430 "removal of superoxide radicals" evidence=IBA] InterPro:IPR001424 InterPro:IPR018152 InterPro:IPR03…	sp|P93407|SODCP_ORYSJ Superoxide dismutase [Cu-Zn], chloroplastic OS=Oryza sativa subsp. japonica GN=SODCP PE=1 SV=1	PSR86551.1 Superoxide dismutase [Actinidia chinensis var. chinensis]	A2YY59_ORYSI/58-198 A2YY59.1 PF00080.17;Sod_Cu;	3847.GLYMA12G08650.1	KR363003 Eurya emarginata Cu-Zn superoxide dismutase (SOD) mRNA, complete cds	mnt:21395019 superoxide dismutase [Cu-Zn], chloroplastic	4.65845
c93685_g1_i2	TAIR|locus:2120061 - symbol:AT4G37530 "AT4G37530" species:3702 "Arabidopsis thaliana" [GO:0004601 "peroxidase activity" evidence=IEA;ISS] [GO:0005576 "extracellular region" evidence=ISM;IEA] [GO:0006979 "response to oxidative stress" evidence=IEA] [GO:0020037 "heme binding" evidence=IEA] [GO:0042744 "hydrogen peroxide catabolic process" evidence=IEA] [GO:0046872 "metal ion binding" evidence=IEA] …	sp|Q9SZE7|PER51_ARATH Peroxidase 51 OS=Arabidopsis thaliana GN=PER51 PE=2 SV=1	PSS36034.1 Peroxidase [Actinidia chinensis var. chinensis]	F6HSU5_VITVI/45-295 F6HSU5.1 PF00141.20;peroxidase;	29760.VIT_07s0129g00360.t01	XM_021773661 PREDICTED: Manihot esculenta peroxidase 73 (LOC110627374), mRNA	csin:114316921 peroxidase 51-like	4.30921
c92095_g1_i5	UNIPROTKB|A9PAB4 - symbol:POPTR_0005s04590g "Superoxide dismutase [Cu-Zn]" species:3694 "Populus trichocarpa" [GO:0004784 "superoxide dismutase activity" evidence=IBA] [GO:0005507 "copper ion binding" evidence=IBA] [GO:0005737 "cytoplasm" evidence=IBA] [GO:0008270 "zinc ion binding" evidence=IBA] [GO:0019430 "removal of superoxide radicals" evidence=IBA] InterPro:IPR001424 InterPro:IPR018152 Inte…	sp|Q8L5E0|SODC2_OLEEU Superoxide dismutase [Cu-Zn] 2 OS=Olea europaea GN=OLE5 PE=1 SV=2	PSR92657.1 Superoxide dismutase [Actinidia chinensis var. chinensis]	U5D3P0_AMBTC/32-172 U5D3P0.1 PF00080.17;Sod_Cu;	3694.POPTR_0005s04590.1	KR078346 Camellia sinensis copper/zinc-superoxide dismutase 1a (CSD1a) mRNA, complete cds	csin:114306074 superoxide dismutase [Cu-Zn] 1	3.53886
c100868_g3_i2	TAIR|locus:2160917 - symbol:RBOHD "AT5G47910" species:3702 "Arabidopsis thaliana" [GO:0004601 "peroxidase activity" evidence=IEA] [GO:0005509 "calcium ion binding" evidence=IEA] [GO:0005634 "nucleus" evidence=ISM] [GO:0016021 "integral component of membrane" evidence=IEA] [GO:0055114 "oxidation-reduction process" evidence=IEA] [GO:0006952 "defense response" evidence=IMP] [GO:0072593 "reactive oxy…	sp|Q2HXL0|RBOHC_SOLTU Respiratory burst oxidase homolog protein C OS=Solanum tuberosum GN=RBOHC PE=1 SV=2	PSR98412.1 Respiratory burst oxidase protein like [Actinidia chinensis var. chinensis]	K4BLU9_SOLLC/731-921 K4BLU9.1 PF08030.9;NAD_binding_6;	4113.PGSC0003DMT400036734	KJ782632 Camellia sinensis NADPH oxidase A (RBOHA) mRNA, complete cds	csin:114267808 respiratory burst oxidase homolog protein C-like	3.28441
c93709_g1_i1	TAIR|locus:2141050 - symbol:AT4G17960 "AT4G17960" species:3702 "Arabidopsis thaliana" [GO:0004601 "peroxidase activity" evidence=IEA] [GO:0005737 "cytoplasm" evidence=ISM] [GO:0008150 "biological_process" evidence=ND] TAIR:locus:2141050 Proteomes:UP000006548 EMBL:CP002687 EMBL:AL161547 GO:GO:0004601 EMBL:AL021889 HOGENOM:HOG000005907 OrthoDB:EOG09360RLD EMBL:AY063832 EMBL:AY091282 PIR:T05082 RefS…	.	PSR93528.1 TRNA-2-methylthio-N(6)-dimethylallyladenosine synthase [Actinidia chinensis var. chinensis]	.	29760.VIT_02s0012g00930.t01	XM_011076435 PREDICTED: Sesamum indicum uncharacterized LOC105159387 (LOC105159387), mRNA	csin:114308522 uncharacterized protein LOC114308522	3.14913
c94089_g1_i1	UNIPROTKB|C1KA92 - symbol:PO2 "Peroxidase" species:3694 "Populus trichocarpa" [GO:0004601 "peroxidase activity" evidence=IBA] [GO:0009505 "plant-type cell wall" evidence=IBA] [GO:0009664 "plant-type cell wall organization" evidence=IBA] InterPro:IPR000823 InterPro:IPR002016 InterPro:IPR010255 InterPro:IPR033905 Pfam:PF00141 PRINTS:PR00458 PRINTS:PR00461 PROSITE:PS50873 GO:GO:0009506 GO:GO:0005576…	sp|Q42580|PER21_ARATH Peroxidase 21 OS=Arabidopsis thaliana GN=PER21 PE=1 SV=1	PSR92856.1 Peroxidase [Actinidia chinensis var. chinensis]	D7TQI6_VITVI/47-291 D7TQI6.1 PF00141.20;peroxidase;	3694.POPTR_0006s13190.1	XM_002275252 PREDICTED: Vitis vinifera peroxidase 21 (LOC100256842), mRNA	tcc:18597922 peroxidase 21	2.9716
c91084_g1_i1	UNIPROTKB|B9H3I3 - symbol:POPTR_0004s07630g "Microsomal glutathione s-transferase family protein" species:3694 "Populus trichocarpa" [GO:0004364 "glutathione transferase activity" evidence=IBA] [GO:0004602 "glutathione peroxidase activity" evidence=IBA] [GO:0005635 "nuclear envelope" evidence=IBA] [GO:0005783 "endoplasmic reticulum" evidence=IBA] GO:GO:0005783 GO:GO:0016021 GO:GO:0005635 GO:GO:00…	sp|Q9CPU4|MGST3_MOUSE Microsomal glutathione S-transferase 3 OS=Mus musculus GN=Mgst3 PE=1 SV=1	PSS30122.1 Microsomal glutathione S-transferase [Actinidia chinensis var. chinensis]	B9SJM5_RICCO/15-138 B9SJM5.1 PF01124.15;MAPEG;	4113.PGSC0003DMT400050791	XM_010064038 PREDICTED: Eucalyptus grandis microsomal glutathione S-transferase 3 (LOC104449775), mRNA	csin:114271703 microsomal glutathione S-transferase 3	2.60118
c89115_g1_i1	TAIR|locus:2088590 - symbol:PAP17 "AT3G17790" species:3702 "Arabidopsis thaliana" [GO:0004601 "peroxidase activity" evidence=IEA] [GO:0004722 "protein serine/threonine phosphatase activity" evidence=ISS] [GO:0005576 "extracellular region" evidence=ISM;IEA] [GO:0046872 "metal ion binding" evidence=IEA] [GO:0055114 "oxidation-reduction process" evidence=IEA] [GO:0009986 "cell surface" evidence=ISS]…	sp|Q9SCX8|PPA17_ARATH Purple acid phosphatase 17 OS=Arabidopsis thaliana GN=PAP17 PE=2 SV=1	PSR84671.1 Purple acid phosphatase [Actinidia chinensis var. chinensis]	I1KQM7_SOYBN/39-250 I1KQM7.1 PF00149.25;Metallophos;	3847.GLYMA05G33630.1	XM_007036918 PREDICTED: Theobroma cacao purple acid phosphatase 17 (LOC18604433), mRNA	csin:114260624 purple acid phosphatase 17-like	2.32132
c91356_g2_i1	UNIPROTKB|D7TAA8 - symbol:VIT_01s0010g00960 "Peroxidase" species:29760 "Vitis vinifera" [GO:0004601 "peroxidase activity" evidence=IBA] [GO:0009505 "plant-type cell wall" evidence=IBA] [GO:0009664 "plant-type cell wall organization" evidence=IBA] InterPro:IPR000823 InterPro:IPR002016 InterPro:IPR010255 InterPro:IPR033905 Pfam:PF00141 PRINTS:PR00458 PRINTS:PR00461 PROSITE:PS50873 GO:GO:0009506 GO:…	sp|O81755|PER48_ARATH Putative Peroxidase 48 OS=Arabidopsis thaliana GN=PER48 PE=3 SV=3	PSR92606.1 Peroxidase [Actinidia chinensis var. chinensis]	B9RI07_RICCO/74-346 B9RI07.1 PF00141.20;peroxidase;	29760.VIT_01s0010g00960.t01	.	vvi:100265025 putative Peroxidase 48	1.88121
c91855_g2_i1	TAIR|locus:2153529 - symbol:PRX52 "AT5G05340" species:3702 "Arabidopsis thaliana" [GO:0004601 "peroxidase activity" evidence=IEA;ISS] [GO:0005576 "extracellular region" evidence=ISM] [GO:0006979 "response to oxidative stress" evidence=IEA] [GO:0020037 "heme binding" evidence=IEA] [GO:0042744 "hydrogen peroxide catabolic process" evidence=IEA] [GO:0046872 "metal ion binding" evidence=IEA] [GO:0055…	sp|A7NY33|PER4_VITVI Peroxidase 4 OS=Vitis vinifera GN=GSVIVT00023967001 PE=1 SV=1	PSR86219.1 Peroxidase [Actinidia chinensis var. chinensis]	A0A022RZQ4_ERYGU/53-296 A0A022RZQ4.1 PF00141.20;peroxidase;	29760.VIT_06s0004g07770.t01	XM_017843279 PREDICTED: Phoenix dactylifera peroxidase 4-like (LOC108511375), mRNA	csin:114262261 peroxidase 4-like	1.74017
c13775_g1_i1	TAIR|locus:2117612 - symbol:NTRB "AT4G35460" species:3702 "Arabidopsis thaliana" [GO:0019430 "removal of superoxide radicals" evidence=IEA] [GO:0055114 "oxidation-reduction process" evidence=IEA;ISS] [GO:0004791 "thioredoxin-disulfide reductase activity" evidence=ISS;IDA] [GO:0009941 "chloroplast envelope" evidence=IDA] [GO:0005739 "mitochondrion" evidence=IDA] [GO:0005829 "cytosol" evidence=IDA]…	sp|Q39243|TRXB1_ARATH Thioredoxin reductase 1, mitochondrial OS=Arabidopsis thaliana GN=NTR1 PE=1 SV=3	PSS00349.1 Thioredoxin reductase [Actinidia chinensis var. chinensis]	K4BA95_SOLLC/48-345 K4BA95.1 PF07992.11;Pyr_redox_2;	29760.VIT_04s0044g01750.t01	.	fve:101291563 thioredoxin reductase NTRB-like	1.73884
c92310_g1_i1	UNIPROTKB|B9GT82 - symbol:PRX17 "Peroxidase" species:3694 "Populus trichocarpa" [GO:0004601 "peroxidase activity" evidence=IBA] [GO:0009505 "plant-type cell wall" evidence=IBA] [GO:0009664 "plant-type cell wall organization" evidence=IBA] InterPro:IPR000823 InterPro:IPR002016 InterPro:IPR010255 InterPro:IPR019794 InterPro:IPR033905 Pfam:PF00141 PRINTS:PR00458 PRINTS:PR00461 PROSITE:PS00436 PROSIT…	sp|Q96520|PER12_ARATH Peroxidase 12 OS=Arabidopsis thaliana GN=PER12 PE=1 SV=1	PSS31699.1 Peroxidase [Actinidia chinensis var. chinensis]	B9GT82_POPTR/54-297 B9GT82.1 PF00141.20;peroxidase;	3694.POPTR_0002s06590.1	XM_007019518 PREDICTED: Theobroma cacao peroxidase 12 (LOC18592677), mRNA	csin:114309672 peroxidase 12-like	1.65645
c91276_g1_i2	UNIPROTKB|K4CUU6 - symbol:K4CUU6 "Peroxidase" species:4081 "Solanum lycopersicum" [GO:0004601 "peroxidase activity" evidence=IBA] [GO:0009505 "plant-type cell wall" evidence=IBA] [GO:0009664 "plant-type cell wall organization" evidence=IBA] InterPro:IPR000823 InterPro:IPR002016 InterPro:IPR010255 InterPro:IPR019794 InterPro:IPR033905 Pfam:PF00141 PRINTS:PR00458 PRINTS:PR00461 PROSITE:PS00436 PROS…	sp|Q93V93|PER44_ARATH Peroxidase 44 OS=Arabidopsis thaliana GN=PER44 PE=2 SV=1	PSS01689.1 Peroxidase [Actinidia chinensis var. chinensis]	A0A022R9P0_ERYGU/25-272 A0A022R9P0.1 PF00141.20;peroxidase;	4081.Solyc09g072700.2.1	XM_004303989 PREDICTED: Fragaria vesca subsp. vesca peroxidase 44 (LOC101310043), mRNA	csin:114271858 peroxidase 44-like	1.63805
c97177_g1_i1	UNIPROTKB|Q9BBU5 - symbol:CCS "Cu/Zn-superoxide dismutase copper chaperone" species:3847 "Glycine max" [GO:0004784 "superoxide dismutase activity" evidence=IBA] [GO:0005507 "copper ion binding" evidence=IBA] [GO:0005737 "cytoplasm" evidence=IBA] [GO:0008270 "zinc ion binding" evidence=IBA] [GO:0019430 "removal of superoxide radicals" evidence=IBA] InterPro:IPR001424 InterPro:IPR006121 InterPro:IP…	sp|Q9LD47|CCS_ARATH Copper chaperone for superoxide dismutase, chloroplastic/cytosolic OS=Arabidopsis thaliana GN=CCS PE=1 SV=1	PSS11472.1 Copper chaperone for superoxide dismutase [Actinidia chinensis var. chinensis]	B9GW33_POPTR/171-301 B9GW33.1 PF00080.17;Sod_Cu;	3847.GLYMA05G04170.1	KP337338 Camellia sinensis cultivar Tieguanyin copper chaperone for superoxide dismutase (CCS) mRNA, complete cds	csin:114267639 copper chaperone for superoxide dismutase, chloroplastic/cytosolic	1.59617
c98827_g4_i1	TAIR|locus:2026616 - symbol:APX1 "AT1G07890" species:3702 "Arabidopsis thaliana" [GO:0004130 "cytochrome-c peroxidase activity" evidence=IBA] [GO:0004601 "peroxidase activity" evidence=IEA] [GO:0005737 "cytoplasm" evidence=ISM] [GO:0006979 "response to oxidative stress" evidence=IEA] [GO:0016688 "L-ascorbate peroxidase activity" evidence=ISS;IMP;TAS] [GO:0020037 "heme binding" evidence=IEA] [GO:0…	sp|P48534|APX1_PEA L-ascorbate peroxidase, cytosolic OS=Pisum sativum GN=APX1 PE=1 SV=2	PSS14315.1 L-ascorbate peroxidase [Actinidia chinensis var. chinensis]	D7TQA5_VITVI/9-226 D7TQA5.1 PF00141.20;peroxidase;	4113.PGSC0003DMT400077268	DQ442272 Camellia sinensis ascorbate peroxidase mRNA, complete cds	csin:114298111 L-ascorbate peroxidase, cytosolic	1.45054
c90684_g1_i1	TAIR|locus:2195623 - symbol:NRX1 "AT1G60420" species:3702 "Arabidopsis thaliana" [GO:0004791 "thioredoxin-disulfide reductase activity" evidence=IBA] [GO:0045454 "cell redox homeostasis" evidence=IEA] [GO:0047134 "protein-disulfide reductase activity" evidence=IEA] [GO:0055114 "oxidation-reduction process" evidence=IEA] [GO:0046686 "response to cadmium ion" evidence=IEP] [GO:0009860 "pollen tube …	sp|O80763|NRX1_ARATH Probable nucleoredoxin 1 OS=Arabidopsis thaliana GN=At1g60420 PE=1 SV=1	PSS28623.1 Nucleoredoxin like [Actinidia chinensis var. chinensis]	B9SH99_RICCO/40-133 B9SH99.1 PF13905.3;Thioredoxin_8;	3694.POPTR_0010s06960.1	XM_021793434 PREDICTED: Hevea brasiliensis probable nucleoredoxin 1 (LOC110641633), mRNA	csin:114299195 probable nucleoredoxin 1	1.43024
c96585_g2_i1	TAIR|locus:2080707 - symbol:2CPA "2-Cys peroxiredoxin A" species:3702 "Arabidopsis thaliana" [GO:0009507 "chloroplast" evidence=ISM;IDA] [GO:0016209 "antioxidant activity" evidence=ISS] [GO:0045454 "cell redox homeostasis" evidence=IEA] [GO:0055114 "oxidation-reduction process" evidence=IEA] [GO:0009579 "thylakoid" evidence=IDA] [GO:0004601 "peroxidase activity" evidence=IDA] [GO:0005515 "protein…	sp|Q96291|BAS1A_ARATH 2-Cys peroxiredoxin BAS1, chloroplastic OS=Arabidopsis thaliana GN=BAS1 PE=1 SV=2	PSS01611.1 2-Cys peroxiredoxin BAS1-like [Actinidia chinensis var. chinensis]	D7TH54_VITVI/82-216 D7TH54.1 PF00578.18;AhpC-TSA;	29760.VIT_08s0007g02490.t01	XM_010655436 PREDICTED: Vitis vinifera 2-Cys peroxiredoxin (LOC100259748), transcript variant X1, mRNA	csin:114277277 2-Cys peroxiredoxin BAS1, chloroplastic-like	1.27604
c78888_g1_i1	UNIPROTKB|A5AGY5 - symbol:VIT_10s0116g01780 "Peroxidase" species:29760 "Vitis vinifera" [GO:0004601 "peroxidase activity" evidence=IBA] [GO:0009505 "plant-type cell wall" evidence=IBA] [GO:0009664 "plant-type cell wall organization" evidence=IBA] InterPro:IPR000823 InterPro:IPR002016 InterPro:IPR010255 InterPro:IPR033905 Pfam:PF00141 PRINTS:PR00458 PRINTS:PR00461 PROSITE:PS50873 GO:GO:0009506 GO:…	sp|Q9SB81|PER42_ARATH Peroxidase 42 OS=Arabidopsis thaliana GN=PER42 PE=1 SV=2	PSS24837.1 Peroxidase [Actinidia chinensis var. chinensis]	A5AGY5_VITVI/51-295 A5AGY5.1 PF00141.20;peroxidase;	29760.VIT_10s0116g01780.t01	GQ227725 Camellia oleifera peroxidase mRNA, complete cds	csin:114274880 peroxidase 42-like	1.15409
c99227_g3_i3	UNIPROTKB|O04873 - symbol:O04873 "Thylakoid-bound ascorbate peroxidase" species:3666 " " [GO:0009533 "chloroplast stromal thylakoid" evidence=IDA] [GO:0009535 "chloroplast thylakoid membrane" evidence=IDA] [GO:0016688 "L-ascorbate peroxidase activity" evidence=NAS] InterPro:IPR002016 InterPro:IPR002207 InterPro:IPR010255 Pfam:PF00141 PRINTS:PR00458 PRINTS:PR00459 PROSITE:PS50873 GO:GO:0016021 GO:…	sp|Q42593|APXT_ARATH L-ascorbate peroxidase T, chloroplastic OS=Arabidopsis thaliana GN=APXT PE=2 SV=2	PSS00417.1 L-ascorbate peroxidase [Actinidia chinensis var. chinensis]	K4D6Q9_SOLLC/88-320 K4D6Q9.1 PF00141.20;peroxidase;	29760.VIT_18s0001g02470.t01	JQ740734 Camellia sinensis chloroplast thylakoid-bound ascorbate peroxidase mRNA, complete cds; nuclear gene for chloroplast product	csin:114284060 probable L-ascorbate peroxidase 6, chloroplastic/mitochondrial isoform X1	1.0677
c89350_g1_i2	TAIR|locus:2148012 - symbol:OCP3 "AT5G11270" species:3702 "Arabidopsis thaliana" [GO:0003677 "DNA binding" evidence=IEA] [GO:0004601 "peroxidase activity" evidence=IEA] [GO:0009507 "chloroplast" evidence=ISM] [GO:0055114 "oxidation-reduction process" evidence=IEA] [GO:0003700 "DNA binding transcription factor activity" evidence=ISS] [GO:0005634 "nucleus" evidence=IDA] [GO:0006952 "defense respons…	sp|Q8H0V5|OCP3_ARATH Protein OVEREXPRESSOR OF CATIONIC PEROXIDASE 3 OS=Arabidopsis thaliana GN=OCP3 PE=1 SV=1	PSS01135.1 Protein OVEREXPRESSOR OF CATIONIC PEROXIDASE like [Actinidia chinensis var. chinensis]	F6H309_VITVI/277-330 F6H309.1 PF00046.26;Homeobox;	4113.PGSC0003DMT400053577	XM_018957322 PREDICTED: Juglans regia protein OVEREXPRESSOR OF CATIONIC PEROXIDASE 3 (LOC108985138), mRNA	csin:114307408 protein OVEREXPRESSOR OF CATIONIC PEROXIDASE 3-like	1.0287
c85680_g2_i1	FB|FBgn0030876 - symbol:CG6762 species:7227 "Drosophila melanogaster" [GO:0055114 "oxidation-reduction process" evidence=IEA] [GO:0005737 "cytoplasm" evidence=IBA] [GO:0034599 "cellular response to oxidative stress" evidence=IBA] [GO:0032542 "sulfiredoxin activity" evidence=IBA] InterPro:IPR016692 PIRSF:PIRSF017267 InterPro:IPR003115 Pfam:PF02195 Proteomes:UP000000803 GO:GO:0005524 GO:GO:0005737 …	sp|Q8GY89|SRX_ARATH Sulfiredoxin, chloroplastic/mitochondrial OS=Arabidopsis thaliana GN=SRX PE=1 SV=1	PSS11107.1 Sulfiredoxin like [Actinidia chinensis var. chinensis]	B9I4P9_POPTR/32-114 B9I4P9.2 PF02195.15;ParBc;	4113.PGSC0003DMT400027064	HM003276 Camellia sinensis clone U10BcDNA 1882 sulfiredoxin-1 mRNA, complete cds	dcr:108204245 sulfiredoxin, chloroplastic/mitochondrial isoform X1	-1.21803
c95328_g1_i1	TAIR|locus:2131586 - symbol:APX3 "AT4G35000" species:3702 "Arabidopsis thaliana" [GO:0000302 "response to reactive oxygen species" evidence=IBA] [GO:0004130 "cytochrome-c peroxidase activity" evidence=IBA] [GO:0016021 "integral component of membrane" evidence=IEA] [GO:0016688 "L-ascorbate peroxidase activity" evidence=ISS] [GO:0020037 "heme binding" evidence=IEA] [GO:0034599 "cellular response to…	sp|Q42564|APX3_ARATH L-ascorbate peroxidase 3 OS=Arabidopsis thaliana GN=APX3 PE=1 SV=1	PSS25985.1 L-ascorbate peroxidase 3, peroxisomal like [Actinidia chinensis var. chinensis]	A0A022RC95_ERYGU/16-224 A0A022RC95.1 PF00141.20;peroxidase;	4113.PGSC0003DMT400015799	JQ011380 Camellia sinensis peroxisomal ascorbate peroxidase (APX-1) mRNA, complete cds	csin:114279703 L-ascorbate peroxidase 3-like	-1.28843
c95490_g1_i1	TAIR|locus:2139712 - symbol:GPX6 "AT4G11600" species:3702 "Arabidopsis thaliana" [GO:0004602 "glutathione peroxidase activity" evidence=ISS] [GO:0005739 "mitochondrion" evidence=ISM;IDA;TAS] [GO:0006979 "response to oxidative stress" evidence=IEA] [GO:0047066 "phospholipid-hydroperoxide glutathione peroxidase activity" evidence=IEA] [GO:0055114 "oxidation-reduction process" evidence=IEA;ISS] [GO:…	sp|O48646|GPX6_ARATH Probable phospholipid hydroperoxide glutathione peroxidase 6, mitochondrial OS=Arabidopsis thaliana GN=GPX6 PE=2 SV=2	GAV57939.1 GSHPx domain-containing protein [Cephalotus follicularis]	B9RCA6_RICCO/10-118 B9RCA6.1 PF00255.16;GSHPx;	3694.POPTR_0003s12620.1	HM003262 Camellia sinensis clone U10BcDNA 2530 glutathione peroxidase mRNA, complete cds	csin:114288986 probable phospholipid hydroperoxide glutathione peroxidase	-1.33274
c96235_g1_i5	TAIR|locus:2039346 - symbol:GPX4 "AT2G48150" species:3702 "Arabidopsis thaliana" [GO:0004602 "glutathione peroxidase activity" evidence=IEA;ISS] [GO:0005739 "mitochondrion" evidence=ISM] [GO:0006979 "response to oxidative stress" evidence=IEA] [GO:0055114 "oxidation-reduction process" evidence=IEA] [GO:0005829 "cytosol" evidence=NAS] [GO:0012505 "endomembrane system" evidence=IDA] InterPro:IPR000…	sp|Q8L910|GPX4_ARATH Probable glutathione peroxidase 4 OS=Arabidopsis thaliana GN=GPX4 PE=2 SV=1	PSR94804.1 Glutathione peroxidase [Actinidia chinensis var. chinensis]	B9T4A6_RICCO/1401-1509 B9T4A6.1 PF00255.16;GSHPx;	4081.Solyc09g064850.2.1	XM_016036103 PREDICTED: Ziziphus jujuba probable glutathione peroxidase 4 (LOC107426020), mRNA	pvy:116108491 protein HUA2-LIKE 2-like	-1.45116
c98614_g1_i1	TAIR|locus:2184657 - symbol:PAP26 "AT5G34850" species:3702 "Arabidopsis thaliana" [GO:0004601 "peroxidase activity" evidence=IEA] [GO:0004722 "protein serine/threonine phosphatase activity" evidence=ISS] [GO:0005576 "extracellular region" evidence=ISM] [GO:0042744 "hydrogen peroxide catabolic process" evidence=IEA] [GO:0046872 "metal ion binding" evidence=IEA] [GO:0055114 "oxidation-reduction pro…	sp|Q949Y3|PPA26_ARATH Bifunctional purple acid phosphatase 26 OS=Arabidopsis thaliana GN=PAP26 PE=1 SV=1	PSS13889.1 Peroxidase [Actinidia chinensis var. chinensis]	B9RP16_RICCO/54-145 B9RP16.1 PF16656.2;Pur_ac_phosph_N;	3694.POPTR_0006s06250.1	KU161153 Camellia oleifera purple acid phosphatase 26 (PAP26) mRNA, complete cds	csin:114265175 bifunctional purple acid phosphatase 26	-1.50158
c93659_g1_i1	TAIR|locus:2173757 - symbol:AT5G40150 "AT5G40150" species:3702 "Arabidopsis thaliana" [GO:0004601 "peroxidase activity" evidence=IEA;ISS] [GO:0005576 "extracellular region" evidence=ISM;IEA] [GO:0006979 "response to oxidative stress" evidence=IEA] [GO:0020037 "heme binding" evidence=IEA] [GO:0042744 "hydrogen peroxide catabolic process" evidence=IEA] [GO:0046872 "metal ion binding" evidence=IEA] …	sp|Q9FL16|PER63_ARATH Peroxidase 63 OS=Arabidopsis thaliana GN=PER63 PE=2 SV=1	PSR87610.1 Peroxidase [Actinidia chinensis var. chinensis]	F6HV28_VITVI/34-287 F6HV28.1 PF00141.20;peroxidase;	29760.VIT_14s0066g01850.t01	XM_018967499 PREDICTED: Juglans regia peroxidase 31-like (LOC108992832), transcript variant X2, mRNA	csin:114261609 peroxidase 31-like	-1.68837
c89224_g1_i1	TAIR|locus:505006336 - symbol:AT3G12685 "AT3G12685" species:3702 "Arabidopsis thaliana" [GO:0004601 "peroxidase activity" evidence=IEA] [GO:0005886 "plasma membrane" evidence=ISM] [GO:0008150 "biological_process" evidence=ND] TAIR:locus:505006336 Proteomes:UP000006548 EMBL:CP002686 GO:GO:0004601 EMBL:AY056158 EMBL:AY096441 RefSeq:NP_566432.1 UniGene:At.26370 STRING:3702.AT3G12685.1 EnsemblPlants:…	sp|O32107|YUID_BACSU Uncharacterized membrane protein YuiD OS=Bacillus subtilis (strain 168) GN=yuiD PE=4 SV=1	PSS14288.1 Acid phosphatase/vanadium-dependent haloperoxidase-related protein [Actinidia chinensis var. chinensis]	A0A022R0Q3_ERYGU/59-262 A0A022R0Q3.1 PF02681.11;DUF212;	4081.Solyc01g005910.2.1	.	csin:114318512 uncharacterized protein LOC114318512 isoform X1	-1.84514
c53596_g1_i1	TAIR|locus:2122333 - symbol:TL29 "AT4G09010" species:3702 "Arabidopsis thaliana" [GO:0000302 "response to reactive oxygen species" evidence=IBA] [GO:0004130 "cytochrome-c peroxidase activity" evidence=IBA] [GO:0004601 "peroxidase activity" evidence=IEA;ISS] [GO:0006979 "response to oxidative stress" evidence=IEA] [GO:0009507 "chloroplast" evidence=ISM;IDA] [GO:0020037 "heme binding" evidence=IEA]…	sp|Q9THX6|TL29_SOLLC Thylakoid lumenal 29 kDa protein, chloroplastic OS=Solanum lycopersicum GN=CLEB3J9 PE=3 SV=1	PSS17384.1 Thylakoid lumenal protein [Actinidia chinensis var. chinensis]	E0CRP4_VITVI/93-272 E0CRP4.1 PF00141.20;peroxidase;	29760.VIT_18s0001g06370.t01	JF815481 Dimocarpus longan clone Unigene6305 APX mRNA, complete cds	csin:114297777 thylakoid lumenal 29 kDa protein, chloroplastic-like	-1.99536
c94066_g1_i2	TAIR|locus:2117793 - symbol:GrxC5 "AT4G28730" species:3702 "Arabidopsis thaliana" [GO:0009055 "electron transfer activity" evidence=IEA] [GO:0009507 "chloroplast" evidence=ISM;IDA] [GO:0015035 "protein disulfide oxidoreductase activity" evidence=IEA] [GO:0045454 "cell redox homeostasis" evidence=IEA] [GO:0004362 "glutathione-disulfide reductase activity" evidence=IDA] [GO:0016226 "iron-sulfur clu…	sp|Q0J3L4|GRS10_ORYSJ Monothiol glutaredoxin-S10 OS=Oryza sativa subsp. japonica GN=GRXS10 PE=2 SV=2	PSR89721.1 Glutaredoxin-C5 like [Actinidia chinensis var. chinensis]	A0A0D3DGN1_BRAOL/86-149 A0A0D3DGN1.1 PF00462.21;Glutaredoxin;	29760.VIT_07s0005g04860.t01	XM_002267016 PREDICTED: Vitis vinifera monothiol glutaredoxin-S10 (LOC100265126), mRNA	csin:114269235 monothiol glutaredoxin-S10	-2.08378
c87618_g2_i1	TAIR|locus:2174693 - symbol:AT5G14130 "AT5G14130" species:3702 "Arabidopsis thaliana" [GO:0004601 "peroxidase activity" evidence=IEA;ISS] [GO:0005576 "extracellular region" evidence=ISM;IEA] [GO:0006979 "response to oxidative stress" evidence=IEA] [GO:0020037 "heme binding" evidence=IEA] [GO:0042744 "hydrogen peroxide catabolic process" evidence=IEA] [GO:0046872 "metal ion binding" evidence=IEA] …	sp|Q96509|PER55_ARATH Peroxidase 55 OS=Arabidopsis thaliana GN=PER55 PE=1 SV=1	PSR87474.1 Peroxidase [Actinidia chinensis var. chinensis]	B9N0X9_POPTR/39-286 B9N0X9.1 PF00141.20;peroxidase;	3694.POPTR_0017s09640.1	XM_002274095 PREDICTED: Vitis vinifera peroxidase 55 (LOC100249751), mRNA	vvi:100249751 peroxidase 55	-2.78851
c93314_g1_i3	TAIR|locus:2023772 - symbol:PER1 "AT1G48130" species:3702 "Arabidopsis thaliana" [GO:0005634 "nucleus" evidence=ISM;IEA] [GO:0005737 "cytoplasm" evidence=IEA] [GO:0016209 "antioxidant activity" evidence=ISS] [GO:0045454 "cell redox homeostasis" evidence=IEA] [GO:0055114 "oxidation-reduction process" evidence=IEA] [GO:0008379 "thioredoxin peroxidase activity" evidence=ISS] [GO:0009269 "response to…	sp|Q6E2Z6|REHY_MEDTR 1-Cys peroxiredoxin OS=Medicago truncatula PE=2 SV=1	PSR85192.1 1-Cys peroxiredoxin like [Actinidia chinensis var. chinensis]	K4BJ26_SOLLC/6-142 K4BJ26.1 PF00578.18;AhpC-TSA;	4081.Solyc03g096040.2.1	AB435081 Diospyros kaki 1cysper1 mRNA for 1-cys peroxiredoxin 1, complete cds	nta:107823604 1-Cys peroxiredoxin-like	-2.98841
c82208_g1_i2	TAIR|locus:2062420 - symbol:AT2G35380 "AT2G35380" species:3702 "Arabidopsis thaliana" [GO:0004601 "peroxidase activity" evidence=IEA;ISS] [GO:0005576 "extracellular region" evidence=ISM;IEA] [GO:0006979 "response to oxidative stress" evidence=IEA] [GO:0020037 "heme binding" evidence=IEA] [GO:0042744 "hydrogen peroxide catabolic process" evidence=IEA] [GO:0046872 "metal ion binding" evidence=IEA] …	sp|Q9SLH7|PER20_ARATH Peroxidase 20 OS=Arabidopsis thaliana GN=PER20 PE=2 SV=1	PSR91657.1 Peroxidase [Actinidia chinensis var. chinensis]	B9MTY8_POPTR/39-290 B9MTY8.1 PF00141.20;peroxidase;	3694.POPTR_0001s02870.1	AC144516 Medicago truncatula clone mth2-28p22, complete sequence	csin:114308469 peroxidase 20	-3.65748
c10847_g1_i1	TAIR|locus:2161193 - symbol:AT5G58400 "AT5G58400" species:3702 "Arabidopsis thaliana" [GO:0004601 "peroxidase activity" evidence=IEA;ISS] [GO:0005576 "extracellular region" evidence=ISM;IEA] [GO:0006979 "response to oxidative stress" evidence=IEA] [GO:0020037 "heme binding" evidence=IEA] [GO:0042744 "hydrogen peroxide catabolic process" evidence=IEA] [GO:0046872 "metal ion binding" evidence=IEA] …	sp|A7NY33|PER4_VITVI Peroxidase 4 OS=Vitis vinifera GN=GSVIVT00023967001 PE=1 SV=1	PSS14177.1 Peroxidase [Actinidia chinensis var. chinensis]	B9I6X2_POPTR/46-289 B9I6X2.2 PF00141.20;peroxidase;	3694.POPTR_0013s15250.1	XM_003523221 PREDICTED: Glycine max peroxidase P7-like (LOC100803637), mRNA	hbr:110644167 peroxidase 4-like	-3.84288

## Sheet: Table S4
Table S4. List of differentially expressed genes related to AsA metabolism
Contig ID	GO	UniProt	NR	Pfam	EggNOG	NT	KO_EUK	Log2 FC (VL/ML)
c95574_g1_i3	TAIR|locus:2134228 - symbol:AT4G33670 "AT4G33670" species:3702 "Arabidopsis thaliana" [GO:0004033 "aldo-keto reductase (NADP) activity" evidence=ISS] [GO:0005737 "cytoplasm" evidence=ISM] [GO:0006012 "galactose metabolic process" evidence=IEA] [GO:0055114 "oxidation-reduction process" evidence=IEA] [GO:0010349 "L-galactose dehydrogenase activity" evidence=IDA] [GO:0019853 "L-ascorbic acid biosynt…	sp|O81884|GALDH_ARATH L-galactose dehydrogenase OS=Arabidopsis thaliana GN=LGALDH PE=1 SV=1	PSS02758.1 L-galactose dehydrogenase [Actinidia chinensis var. chinensis]	D7T3I7_VITVI/18-304 D7T3I7.1 PF00248.18;Aldo_ket_red;	3694.POPTR_0009s08490.1	AY176585 Actinidia deliciosa galactose dehydrogenase mRNA, complete cds	csin:114284603 L-galactose dehydrogenase	1.9002
c83898_g2_i1	UNIPROTKB|Q9SQ64 - symbol:COR2 "Non-functional NADPH-dependent codeinone reductase 2" species:3469 "Papaver somniferum" [GO:0047036 "codeinone reductase (NADPH) activity" evidence=IDA] InterPro:IPR018170 InterPro:IPR020471 PIRSF:PIRSF000097 PRINTS:PR00069 PROSITE:PS00062 PROSITE:PS00063 PROSITE:PS00798 Pfam:PF00248 InterPro:IPR023210 GO:GO:0005829 GO:GO:0016491 CDD:cd06660 Gene3D:3.20.20.100 Inte…	sp|O49133|GALUR_FRAAN D-galacturonate reductase OS=Fragaria ananassa GN=GALUR PE=1 SV=1	PSS26823.1 D-galacturonate reductase [Actinidia chinensis var. chinensis]	D7T8E4_VITVI/18-292 D7T8E4.1 PF00248.18;Aldo_ket_red;	29760.VIT_01s0011g06500.t01	GU339035 Actinidia deliciosa cultivar qinmei D-galacturonic acid reductase 1 (GalUR1) mRNA, complete cds	qsu:112039897 D-galacturonate reductase-like	1.98253
c130796_g1_i1	UNIPROTKB|B9VRJ2 - symbol:COR1.5 "NADPH-dependent codeinone reductase 1-5" species:3469 "Papaver somniferum" [GO:0005829 "cytosol" evidence=IDA] UniPathway:UPA00852 InterPro:IPR018170 InterPro:IPR020471 PIRSF:PIRSF000097 PRINTS:PR00069 PROSITE:PS00062 PROSITE:PS00063 PROSITE:PS00798 Pfam:PF00248 InterPro:IPR023210 GO:GO:0005829 CDD:cd06660 Gene3D:3.20.20.100 InterPro:IPR036812 PANTHER:PTHR11732 S…	sp|O49133|GALUR_FRAAN D-galacturonate reductase OS=Fragaria ananassa GN=GALUR PE=1 SV=1	PSS26822.1 D-galacturonate reductase [Actinidia chinensis var. chinensis]	D7T8E4_VITVI/18-292 D7T8E4.1 PF00248.18;Aldo_ket_red;	29760.VIT_01s0011g06500.t01	GU339038 Actinidia deliciosa cultivar qinmei D-galacturonic acid reductase 2 (GalUR2) mRNA, partial cds	dzi:111287841 D-galacturonate reductase-like	2.45914
c98827_g4_i1	TAIR|locus:2026616 - symbol:APX1 "AT1G07890" species:3702 "Arabidopsis thaliana" [GO:0004130 "cytochrome-c peroxidase activity" evidence=IBA] [GO:0004601 "peroxidase activity" evidence=IEA] [GO:0005737 "cytoplasm" evidence=ISM] [GO:0006979 "response to oxidative stress" evidence=IEA] [GO:0016688 "L-ascorbate peroxidase activity" evidence=ISS;IMP;TAS] [GO:0020037 "heme binding" evidence=IEA] [GO:0…	sp|P48534|APX1_PEA L-ascorbate peroxidase, cytosolic OS=Pisum sativum GN=APX1 PE=1 SV=2	PSS14315.1 L-ascorbate peroxidase [Actinidia chinensis var. chinensis]	D7TQA5_VITVI/9-226 D7TQA5.1 PF00141.20;peroxidase;	4113.PGSC0003DMT400077268	DQ442272 Camellia sinensis ascorbate peroxidase mRNA, complete cds	csin:114298111 L-ascorbate peroxidase, cytosolic	1.45054
c95328_g1_i1	TAIR|locus:2131586 - symbol:APX3 "AT4G35000" species:3702 "Arabidopsis thaliana" [GO:0000302 "response to reactive oxygen species" evidence=IBA] [GO:0004130 "cytochrome-c peroxidase activity" evidence=IBA] [GO:0016021 "integral component of membrane" evidence=IEA] [GO:0016688 "L-ascorbate peroxidase activity" evidence=ISS] [GO:0020037 "heme binding" evidence=IEA] [GO:0034599 "cellular response to…	sp|Q42564|APX3_ARATH L-ascorbate peroxidase 3 OS=Arabidopsis thaliana GN=APX3 PE=1 SV=1	PSS25985.1 L-ascorbate peroxidase 3, peroxisomal like [Actinidia chinensis var. chinensis]	A0A022RC95_ERYGU/16-224 A0A022RC95.1 PF00141.20;peroxidase;	4113.PGSC0003DMT400015799	JQ011380 Camellia sinensis peroxisomal ascorbate peroxidase (APX-1) mRNA, complete cds	csin:114279703 L-ascorbate peroxidase 3-like	-1.28843
c89758_g2_i1	TAIR|locus:2086430 - symbol:MDAR4 "monodehydroascorbate reductase 4" species:3702 "Arabidopsis thaliana" [GO:0005737 "cytoplasm" evidence=ISM] [GO:0016021 "integral component of membrane" evidence=IEA] [GO:0050660 "flavin adenine dinucleotide binding" evidence=IEA] [GO:0055114 "oxidation-reduction process" evidence=IEA] [GO:0009941 "chloroplast envelope" evidence=IDA] [GO:0005778 "peroxisomal mem…	sp|Q9LK94|MDAR4_ARATH Monodehydroascorbate reductase 4, peroxisomal OS=Arabidopsis thaliana GN=MDAR4 PE=1 SV=1	PSR87572.1 Monodehydroascorbate reductase 4, peroxisomal like [Actinidia chinensis var. chinensis]	A5BNW8_VITVI/5-321 A5BNW8.1 PF07992.11;Pyr_redox_2;	29760.VIT_14s0066g01100.t01	XM_002277164 PREDICTED: Vitis vinifera monodehydroascorbate reductase 4, peroxisomal (LOC100267896), mRNA	csin:114280285 monodehydroascorbate reductase 4, peroxisomal isoform X1	-1.15147

## Sheet: Table S5
Table S5. List of differentially expressed genes related to starch degradation pathway
Contig ID	GO	UniProt	NR	Pfam	EggNOG	NT	KO_EUK	Log2 FC (VL/ML)
c79868_g1_i1	.	.	AFO84076.1 beta-amylase [Actinidia chinensis]	.	3694.POPTR_0003s03330.1	JX067531 Actinidia chinensis clone 1475710 beta-amylase (BAM3.1) mRNA, complete cds	csin:114285056 beta-amylase 3, chloroplastic-like	-3.80727
c93786_g1_i1	TAIR|locus:2130504 - symbol:CT-BMY "chloroplast beta-amylase" species:3702 "Arabidopsis thaliana" [GO:0009507 "chloroplast" evidence=ISM] [GO:0016161 "beta-amylase activity" evidence=ISS;IDA] [GO:0102229 "amylopectin maltohydrolase activity" evidence=IEA] [GO:0005983 "starch catabolic process" evidence=IDA;IMP;TAS] [GO:0009570 "chloroplast stroma" evidence=IDA] [GO:0009409 "response to cold" evid…	sp|O23553|BAM3_ARATH Beta-amylase 3, chloroplastic OS=Arabidopsis thaliana GN=BAM3 PE=1 SV=3	AOQ26237.1 BAM3L [Actinidia deliciosa]	F6HTE7_VITVI/84-501 F6HTE7.1 PF01373.14;Glyco_hydro_14;	3694.POPTR_0003s03330.1	KX383649 Actinidia deliciosa BAM3L mRNA, complete cds	csin:114285056 beta-amylase 3, chloroplastic-like	-3.32777
c99932_g2_i1	TAIR|locus:2180029 - symbol:BMY3 "AT5G18670" species:3702 "Arabidopsis thaliana" [GO:0000272 "polysaccharide catabolic process" evidence=IEA] [GO:0005737 "cytoplasm" evidence=IEA] [GO:0009507 "chloroplast" evidence=ISM] [GO:0016161 "beta-amylase activity" evidence=IEA;ISS] InterPro:IPR001554 Pfam:PF01373 PRINTS:PR00750 TAIR:locus:2180029 Proteomes:UP000006548 GO:GO:0005737 EMBL:CP002688 InterPro:…	sp|Q8VYW2|BAM9_ARATH Inactive beta-amylase 9 OS=Arabidopsis thaliana GN=BAM9 PE=2 SV=1	AFO84078.1 beta-amylase [Actinidia arguta]	F6HDH8_VITVI/89-500 F6HDH8.1 PF01373.14;Glyco_hydro_14;	29760.VIT_05s0020g01910.t01	JX067533 Actinidia arguta clone 1475709 beta-amylase (BAM9) mRNA, complete cds	csin:114264869 inactive beta-amylase 9-like	-2.47888
c96371_g1_i2	TAIR|locus:2122343 - symbol:ISA3 "AT4G09020" species:3702 "Arabidopsis thaliana" [GO:0004556 "alpha-amylase activity" evidence=ISS] [GO:0005975 "carbohydrate metabolic process" evidence=ISS] [GO:0005983 "starch catabolic process" evidence=IEA;IMP] [GO:0009507 "chloroplast" evidence=ISM;IDA] [GO:0009570 "chloroplast stroma" evidence=IDA] [GO:0009569 "chloroplast starch grain" evidence=IDA] [GO:001…	sp|Q9M0S5|ISOA3_ARATH Isoamylase 3, chloroplastic OS=Arabidopsis thaliana GN=ISA3 PE=1 SV=2	AOQ26243.1 ISA3 [Actinidia deliciosa]	B9RJQ8_RICCO/276-640 B9RJQ8.1 PF00128.21;Alpha-amylase;	29760.VIT_18s0001g06520.t01	KX383655 Actinidia deliciosa ISA3 mRNA, complete cds	tss:122668142 isoamylase 3, chloroplastic isoform X1	-1.80786
c102833_g1_i1	TAIR|locus:2050720 - symbol:BAM7 "AT2G45880" species:3702 "Arabidopsis thaliana" [GO:0000272 "polysaccharide catabolic process" evidence=IEA] [GO:0005737 "cytoplasm" evidence=ISM;IEA] [GO:0016161 "beta-amylase activity" evidence=ISS;IDA] [GO:0102229 "amylopectin maltohydrolase activity" evidence=IEA] [GO:0003700 "DNA binding transcription factor activity" evidence=IDA] [GO:0005634 "nucleus" evide…	sp|O80831|BAM7_ARATH Beta-amylase 7 OS=Arabidopsis thaliana GN=BAM7 PE=1 SV=2	PSS04350.1 Beta-amylase [Actinidia chinensis var. chinensis]	F6I626_VITVI/265-685 F6I626.1 PF01373.14;Glyco_hydro_14;	29760.VIT_15s0046g02640.t01	KX383650 Actinidia deliciosa BAM7 mRNA, complete cds	csin:114321942 beta-amylase 7	-1.79694
c94498_g7_i1	TAIR|locus:2061216 - symbol:ISA1 "AT2G39930" species:3702 "Arabidopsis thaliana" [GO:0004553 "hydrolase activity, hydrolyzing O-glycosyl compounds" evidence=IEA] [GO:0004556 "alpha-amylase activity" evidence=ISS] [GO:0005975 "carbohydrate metabolic process" evidence=IEA;ISS] [GO:0009507 "chloroplast" evidence=ISM;IDA] [GO:0019252 "starch biosynthetic process" evidence=IEA] [GO:0010021 "amylopecti…	sp|O04196|ISOA1_ARATH Isoamylase 1, chloroplastic OS=Arabidopsis thaliana GN=ISA1 PE=1 SV=1	AOQ26241.1 ISA1 [Actinidia deliciosa]	D0LNN1_HALO1/185-543 D0LNN1.1 PF00128.21;Alpha-amylase;	3694.POPTR_0006s07010.1	KX383653 Actinidia deliciosa ISA1 mRNA, complete cds	csin:114280589 isoamylase 1, chloroplastic	-1.18916
c80343_g1_i1	TAIR|locus:2196759 - symbol:AMY3 "AT1G69830" species:3702 "Arabidopsis thaliana" [GO:0004556 "alpha-amylase activity" evidence=ISS;IMP;IDA] [GO:0005509 "calcium ion binding" evidence=IEA] [GO:0005576 "extracellular region" evidence=ISM] [GO:0103025 "alpha-amylase activity (releasing maltohexaose)" evidence=IEA] [GO:0009507 "chloroplast" evidence=IDA] [GO:0005983 "starch catabolic process" evidenc…	sp|Q94A41|AMY3_ARATH Alpha-amylase 3, chloroplastic OS=Arabidopsis thaliana GN=AMY3 PE=1 SV=1	AFO84072.1 alpha-amylase [Actinidia chinensis] <PSS28709.1 Alpha-amylase [Actinidia chinensis var. chinensis]	W1P9X6_AMBTC/564-857 W1P9X6.1 PF00128.21;Alpha-amylase;	29760.VIT_01s0026g01660.t01	JX067527 Actinidia chinensis clone 1475733 alpha-amylase (AMY3) mRNA, complete cds	csin:114298781 LOW QUALITY PROTEIN: alpha-amylase 3, chloroplastic-like	-1.10787
c101398_g1_i3	TAIR|locus:2158455 - symbol:BMY2 "AT5G45300" species:3702 "Arabidopsis thaliana" [GO:0000272 "polysaccharide catabolic process" evidence=IEA] [GO:0005737 "cytoplasm" evidence=ISM;IEA] [GO:0016161 "beta-amylase activity" evidence=IEA;ISS;IDA] [GO:0102229 "amylopectin maltohydrolase activity" evidence=IEA] [GO:0003700 "DNA binding transcription factor activity" evidence=IDA] [GO:0005634 "nucleus" e…	sp|Q9FH80|BAM8_ARATH Beta-amylase 8 OS=Arabidopsis thaliana GN=BAM8 PE=1 SV=1	PSS01267.1 Beta-amylase [Actinidia chinensis var. chinensis]	F6HJ37_VITVI/204-605 F6HJ37.1 PF01373.14;Glyco_hydro_14;	3694.POPTR_0003s10570.1	KX383651 Actinidia deliciosa BAM8 mRNA, complete cds	csin:114316397 beta-amylase 8 isoform X1	-1.00708
c80194_g1_i1	TAIR|locus:2127033 - symbol:BAM2 "AT4G00490" species:3702 "Arabidopsis thaliana" [GO:0000272 "polysaccharide catabolic process" evidence=IEA] [GO:0005737 "cytoplasm" evidence=ISM] [GO:0016161 "beta-amylase activity" evidence=ISS;IDA] [GO:0102229 "amylopectin maltohydrolase activity" evidence=IEA] [GO:0009507 "chloroplast" evidence=IDA] [GO:0009570 "chloroplast stroma" evidence=IDA] InterPro:IPR00…	sp|O65258|BAM2_ARATH Beta-amylase 2, chloroplastic OS=Arabidopsis thaliana GN=BAM2 PE=1 SV=2	AOQ26236.1 BAM2L [Actinidia deliciosa]	W1NHS0_AMBTC/122-542 W1NHS0.1 PF01373.14;Glyco_hydro_14;	29760.VIT_15s0046g02620.t01	KX383648 Actinidia deliciosa BAM2L mRNA, complete cds	csin:114321941 beta-amylase 2, chloroplastic	1.06072
c102266_g1_i1	TAIR|locus:2076086 - symbol:BAM1 "AT3G23920" species:3702 "Arabidopsis thaliana" [GO:0009507 "chloroplast" evidence=ISM;IEA] [GO:0016161 "beta-amylase activity" evidence=ISS;IDA] [GO:0102229 "amylopectin maltohydrolase activity" evidence=IEA] [GO:0005983 "starch catabolic process" evidence=IDA;IMP] [GO:0005634 "nucleus" evidence=IDA] [GO:0005829 "cytosol" evidence=IDA] [GO:0009414 "response to wa…	sp|Q9LIR6|BAM1_ARATH Beta-amylase 1, chloroplastic OS=Arabidopsis thaliana GN=BAM1 PE=1 SV=1	PSS35921.1 Beta-amylase [Actinidia chinensis var. chinensis]	B9RWS7_RICCO/110-533 B9RWS7.1 PF01373.14;Glyco_hydro_14;	4113.PGSC0003DMT400003933	KC171741 Actinidia chinensis beta-amylase (BAM1) mRNA, partial cds	csin:114262520 beta-amylase 1, chloroplastic-like	1.0755
c100705_g1_i5	TAIR|locus:2076086 - symbol:BAM1 "AT3G23920" species:3702 "Arabidopsis thaliana" [GO:0009507 "chloroplast" evidence=ISM;IEA] [GO:0016161 "beta-amylase activity" evidence=ISS;IDA] [GO:0102229 "amylopectin maltohydrolase activity" evidence=IEA] [GO:0005983 "starch catabolic process" evidence=IDA;IMP] [GO:0005634 "nucleus" evidence=IDA] [GO:0005829 "cytosol" evidence=IDA] [GO:0009414 "response to wa…	sp|Q9LIR6|BAM1_ARATH Beta-amylase 1, chloroplastic OS=Arabidopsis thaliana GN=BAM1 PE=1 SV=1	PSS35921.1 Beta-amylase [Actinidia chinensis var. chinensis]	B9RWS7_RICCO/110-533 B9RWS7.1 PF01373.14;Glyco_hydro_14;	3694.POPTR_0010s07340.1	KC171741 Actinidia chinensis beta-amylase (BAM1) mRNA, partial cds	csin:114262520 beta-amylase 1, chloroplastic-like	1.48062
c94498_g7_i1	TAIR|locus:2061216 - symbol:ISA1 "AT2G39930" species:3702 "Arabidopsis thaliana" [GO:0004553 "hydrolase activity, hydrolyzing O-glycosyl compounds" evidence=IEA] [GO:0004556 "alpha-amylase activity" evidence=ISS] [GO:0005975 "carbohydrate metabolic process" evidence=IEA;ISS] [GO:0009507 "chloroplast" evidence=ISM;IDA] [GO:0019252 "starch biosynthetic process" evidence=IEA] [GO:0010021 "amylopecti…	sp|O04196|ISOA1_ARATH Isoamylase 1, chloroplastic OS=Arabidopsis thaliana GN=ISA1 PE=1 SV=1	AOQ26241.1 ISA1 [Actinidia deliciosa]	D0LNN1_HALO1/185-543 D0LNN1.1 PF00128.21;Alpha-amylase;	3694.POPTR_0006s07010.1	KX383653 Actinidia deliciosa ISA1 mRNA, complete cds	csin:114280589 isoamylase 1, chloroplastic	-1.18916
c87373_g1_i1	UNIPROTKB|I1K5Z4 - symbol:GLYMA_05G226600 "Phosphotransferase" species:3847 "Glycine max" [GO:0001678 "cellular glucose homeostasis" evidence=IBA] [GO:0004340 "glucokinase activity" evidence=IBA] [GO:0005829 "cytosol" evidence=IBA] [GO:0006096 "glycolytic process" evidence=IBA] [GO:0008865 "fructokinase activity" evidence=IBA] [GO:0019158 "mannokinase activity" evidence=IBA] InterPro:IPR001312 In…	sp|Q9SEK3|HXK1_SPIOL Hexokinase-1 OS=Spinacia oleracea GN=HXK1 PE=2 SV=1	AFO84083.1 hexokinase [Actinidia chinensis]	I1K5Z4_SOYBN/246-488 I1K5Z4.1 PF03727.13;Hexokinase_2;	3847.GLYMA05G35890.1	JX067538 Actinidia chinensis clone 1475764 hexokinase (HK1.1) mRNA, complete cds	csin:114306807 hexokinase-1-like	-1.51486
c96516_g3_i1	UNIPROTKB|K4D9D5 - symbol:K4D9D5 "Phosphotransferase" species:4081 "Solanum lycopersicum" [GO:0001678 "cellular glucose homeostasis" evidence=IBA] [GO:0004340 "glucokinase activity" evidence=IBA] [GO:0005829 "cytosol" evidence=IBA] [GO:0006096 "glycolytic process" evidence=IBA] [GO:0008865 "fructokinase activity" evidence=IBA] [GO:0019158 "mannokinase activity" evidence=IBA] InterPro:IPR001312 In…	sp|Q9LPS1|HXK3_ARATH Hexokinase-3 OS=Arabidopsis thaliana GN=At1g50460 PE=1 SV=1	PSS21616.1 Hexokinase-3 like [Actinidia chinensis var. chinensis]	M1B0G1_SOLTU/40-240 M1B0G1.1 PF00349.18;Hexokinase_1;	4113.PGSC0003DMT400034299	XM_010093905 Morus notabilis hypothetical protein partial mRNA	cann:107848321 hexokinase-3	1.5939
c99474_g1_i1	TAIR|locus:2165462 - symbol:AT5G42740 "AT5G42740" species:3702 "Arabidopsis thaliana" [GO:0004347 "glucose-6-phosphate isomerase activity" evidence=IEA;ISS] [GO:0005737 "cytoplasm" evidence=ISM] [GO:0006094 "gluconeogenesis" evidence=IEA;ISS] [GO:0006096 "glycolytic process" evidence=IEA;ISS] [GO:0046686 "response to cadmium ion" evidence=IEP] [GO:0009817 "defense response to fungus, incompatible…	sp|P54237|G6PI1_CLAMI Glucose-6-phosphate isomerase, cytosolic 1 OS=Clarkia mildrediae GN=PGIC1 PE=3 SV=1	PSS31347.1 Glucose-6-phosphate isomerase [Actinidia chinensis var. chinensis]	E0CQ39_VITVI/51-547 E0CQ39.1 PF00342.16;PGI;	29760.VIT_18s0001g12370.t01	XM_010666377 PREDICTED: Vitis vinifera glucose-6-phosphate isomerase (LOC100252335), transcript variant X2, mRNA	csin:114305649 glucose-6-phosphate isomerase, cytosolic	-1.48129
c99439_g2_i1	TAIR|locus:2121929 - symbol:PGI1 "AT4G24620" species:3702 "Arabidopsis thaliana" [GO:0006094 "gluconeogenesis" evidence=IEA] [GO:0006096 "glycolytic process" evidence=IEA] [GO:0009507 "chloroplast" evidence=ISM;IDA] [GO:0004347 "glucose-6-phosphate isomerase activity" evidence=ISS] [GO:0005982 "starch metabolic process" evidence=IMP] [GO:0009536 "plastid" evidence=ISS] [GO:0009911 "positive regul…	sp|Q8H103|G6PIP_ARATH Glucose-6-phosphate isomerase 1, chloroplastic OS=Arabidopsis thaliana GN=PGI1 PE=1 SV=1	PSS31592.1 Glucose-6-phosphate isomerase [Actinidia chinensis var. chinensis]	G6PIP_ARATH/94-450 Q8H103.1 PF00342.16;PGI;	29760.VIT_18s0001g07280.t01	XM_002285660 PREDICTED: Vitis vinifera glucose-6-phosphate isomerase 1, chloroplastic (LOC100262681), mRNA	csin:114299759 glucose-6-phosphate isomerase 1, chloroplastic-like	-1.28744
c93436_g3_i1	UNIPROTKB|F6HFF7 - symbol:VIT_01s0011g05370 "Putative uncharacterized protein" species:29760 "Vitis vinifera" [GO:0004614 "phosphoglucomutase activity" evidence=IBA] [GO:0005829 "cytosol" evidence=IBA] [GO:0005978 "glycogen biosynthetic process" evidence=IBA] [GO:0006006 "glucose metabolic process" evidence=IBA] [GO:0009570 "chloroplast stroma" evidence=IBA] [GO:0009590 "detection of gravity" evi…	sp|Q9ZSQ4|PGMC_POPTN Phosphoglucomutase, cytoplasmic OS=Populus tremula GN=PGM1 PE=2 SV=1	PSR91057.1 Phosphoglucomutase [Actinidia chinensis var. chinensis]	B9SP64_RICCO/15-164 B9SP64.1 PF02878.13;PGM_PMM_I;	29760.VIT_01s0011g05370.t01	XM_002284693 PREDICTED: Vitis vinifera phosphoglucomutase, cytoplasmic (LOC100266376), mRNA	csin:114264654 phosphoglucomutase, cytoplasmic	-1.85848
c99240_g1_i3	UNIPROTKB|D7T4L5 - symbol:VIT_13s0067g01470 "Putative uncharacterized protein" species:29760 "Vitis vinifera" [GO:0005829 "cytosol" evidence=IBA] [GO:0070569 "uridylyltransferase activity" evidence=IBA] [GO:0003977 "UDP-N-acetylglucosamine diphosphorylase activity" evidence=IBA] [GO:0006048 "UDP-N-acetylglucosamine biosynthetic process" evidence=IBA] InterPro:IPR002618 Pfam:PF01704 GO:GO:0005829 …	sp|F4IY62|UGPA3_ARATH UTP--glucose-1-phosphate uridylyltransferase 3, chloroplastic OS=Arabidopsis thaliana GN=UGP3 PE=1 SV=1	PSS34449.1 UTP--glucose-1-phosphate uridylyltransferase [Actinidia chinensis var. chinensis]	B9HSL1_POPTR/342-580 B9HSL1.1 PF01704.15;UDPGP;	29760.VIT_13s0067g01470.t01	XM_010659945 PREDICTED: Vitis vinifera UTP--glucose-1-phosphate uridylyltransferase 3, chloroplastic (LOC100241552), transcript variant X3, mRNA	csin:114266306 UTP--glucose-1-phosphate uridylyltransferase 3, chloroplastic isoform X1	-1.45328
c100492_g1_i2	TAIR|locus:2160897 - symbol:PFK2 "AT5G47810" species:3702 "Arabidopsis thaliana" [GO:0003872 "6-phosphofructokinase activity" evidence=ISS] [GO:0005524 "ATP binding" evidence=IEA] [GO:0005737 "cytoplasm" evidence=ISM] [GO:0005945 "6-phosphofructokinase complex" evidence=ISS] [GO:0006002 "fructose 6-phosphate metabolic process" evidence=IEA] [GO:0006096 "glycolytic process" evidence=ISS] [GO:00468…	sp|Q9FIK0|PFKA2_ARATH ATP-dependent 6-phosphofructokinase 2 OS=Arabidopsis thaliana GN=PFK2 PE=1 SV=1	XP_021622805.1 ATP-dependent 6-phosphofructokinase 2 [Manihot esculenta] <OAY41242.1 hypothetical protein MANES_09G085200 [Manihot esculenta]	B9N3V5_POPTR/109-444 B9N3V5.1 PF00365.17;PFK;	29760.VIT_00s0780g00010.t01	XM_021884185 PREDICTED: Chenopodium quinoa ATP-dependent 6-phosphofructokinase 2-like (LOC110706292), mRNA	csin:114273428 ATP-dependent 6-phosphofructokinase 2	-2.63109
c98060_g4_i1	TAIR|locus:2026465 - symbol:FLN2 "fructokinase-like 2" species:3702 "Arabidopsis thaliana" [GO:0005737 "cytoplasm" evidence=ISM] [GO:0016301 "kinase activity" evidence=ISS] [GO:0009295 "nucleoid" evidence=IDA] [GO:0042644 "chloroplast nucleoid" evidence=IDA] [GO:0009658 "chloroplast organization" evidence=IMP] [GO:0009662 "etioplast organization" evidence=IMP] [GO:0042793 "plastid transcription" …	sp|F4I0K2|SCKL2_ARATH Fructokinase-like 2, chloroplastic OS=Arabidopsis thaliana GN=FLN2 PE=1 SV=2	PSS13493.1 Fructokinase-like [Actinidia chinensis var. chinensis]	D7T9Y5_VITVI/215-522 D7T9Y5.1 PF00294.21;PfkB;	29760.VIT_01s0011g00240.t01	KX058236 Camellia sinensis cultivar Longjing 43 fructokinase 5 (FRK5) mRNA, complete cds	csin:114299038 fructokinase-like 2, chloroplastic	-1.20071
c100999_g3_i4	TAIR|locus:2041208 - symbol:PFK5 "AT2G22480" species:3702 "Arabidopsis thaliana" [GO:0003872 "6-phosphofructokinase activity" evidence=ISS] [GO:0005524 "ATP binding" evidence=IEA] [GO:0005945 "6-phosphofructokinase complex" evidence=ISS] [GO:0006002 "fructose 6-phosphate metabolic process" evidence=IEA] [GO:0006096 "glycolytic process" evidence=ISS] [GO:0009507 "chloroplast" evidence=ISM;IDA] [GO…	sp|Q8VYN6|PFKA5_ARATH ATP-dependent 6-phosphofructokinase 5, chloroplastic OS=Arabidopsis thaliana GN=PFK5 PE=1 SV=1	PSS21485.1 ATP-dependent 6-phosphofructokinase [Actinidia chinensis var. chinensis]	B9HFR9_POPTR/176-481 B9HFR9.2 PF00365.17;PFK;	4081.Solyc11g010450.1.1	KF696384 Camellia sinensis phosphofructokinase (PFK5) mRNA, complete cds	csin:114274222 ATP-dependent 6-phosphofructokinase 5, chloroplastic-like	1.38745
c88794_g1_i1	TAIR|locus:2097553 - symbol:FRK7 "AT3G59480" species:3702 "Arabidopsis thaliana" [GO:0005524 "ATP binding" evidence=IEA] [GO:0005737 "cytoplasm" evidence=ISM] [GO:0016301 "kinase activity" evidence=ISS] [GO:0019252 "starch biosynthetic process" evidence=IEA] [GO:0005829 "cytosol" evidence=IDA] [GO:0006000 "fructose metabolic process" evidence=IDA] [GO:0008865 "fructokinase activity" evidence=IDA]…	sp|Q9M1B9|SCRK4_ARATH Probable fructokinase-4 OS=Arabidopsis thaliana GN=At3g59480 PE=2 SV=1	PSR98306.1 Fructokinase-4 like [Actinidia chinensis var. chinensis]	A5B8T3_VITVI/13-320 A5B8T3.1 PF00294.21;PfkB;	29760.VIT_05s0102g00710.t01	JX067536 Actinidia chinensis clone 1542632 fructokinase (FK4.2) mRNA, complete cds	hbr:110670762 probable fructokinase-4	2.96118
c91003_g1_i2	TAIR|locus:2136849 - symbol:PFK3 "AT4G26270" species:3702 "Arabidopsis thaliana" [GO:0003872 "6-phosphofructokinase activity" evidence=ISS;IDA] [GO:0005524 "ATP binding" evidence=IEA] [GO:0005737 "cytoplasm" evidence=ISM] [GO:0005945 "6-phosphofructokinase complex" evidence=ISS] [GO:0006002 "fructose 6-phosphate metabolic process" evidence=IEA] [GO:0006096 "glycolytic process" evidence=ISS;IDA] […	sp|Q94AA4|PFKA3_ARATH ATP-dependent 6-phosphofructokinase 3 OS=Arabidopsis thaliana GN=PFK3 PE=1 SV=1	PSS20831.1 ATP-dependent 6-phosphofructokinase [Actinidia chinensis var. chinensis]	B9RKE5_RICCO/152-458 B9RKE5.1 PF00365.17;PFK;	29760.VIT_11s0016g02850.t01	XM_002283238 PREDICTED: Vitis vinifera ATP-dependent 6-phosphofructokinase 3 (LOC100243946), mRNA	csin:114320971 ATP-dependent 6-phosphofructokinase 3-like	3.52863
c87471_g1_i1	TAIR|locus:2118249 - symbol:PFK1 "AT4G29220" species:3702 "Arabidopsis thaliana" [GO:0003872 "6-phosphofructokinase activity" evidence=ISS;IDA] [GO:0005524 "ATP binding" evidence=IEA] [GO:0005737 "cytoplasm" evidence=ISM] [GO:0005945 "6-phosphofructokinase complex" evidence=ISS] [GO:0006002 "fructose 6-phosphate metabolic process" evidence=IEA] [GO:0006096 "glycolytic process" evidence=ISS;IDA] […	sp|Q9M0F9|PFKA1_ARATH ATP-dependent 6-phosphofructokinase 1 OS=Arabidopsis thaliana GN=PFK1 PE=1 SV=1	PSS20831.1 ATP-dependent 6-phosphofructokinase [Actinidia chinensis var. chinensis]	.	29760.VIT_11s0016g02850.t01	XM_017365698 PREDICTED: Daucus carota subsp. sativus ATP-dependent 6-phosphofructokinase 3-like (LOC108197963), mRNA	qsu:112032505 ATP-dependent 6-phosphofructokinase 3-like	3.62592
